# Supplementary material
Source: Springer Nature journal article supplement (https://www.springermedizin.de/resource/supplementary/12876_2012_916_MOESM1_ESM.pdf/9438060)
Supplement: MOESM1 [file 9438060]

| <b>Symptom</b>               | <b>Absent</b> | <b>Mild</b> | <b>Moderate</b> | <b>Severe</b> |
|------------------------------|---------------|-------------|-----------------|---------------|
| <i>Epigastric pain</i>       |               |             |                 |               |
| <i>Heartburn</i>             |               |             |                 |               |
| <i>Pirosis</i>               |               |             |                 |               |
| <i>Regurgitation</i>         |               |             |                 |               |
| <i>Postprandial fullness</i> |               |             |                 |               |
| <i>Nausea</i>                |               |             |                 |               |
| <i>Vomiting</i>              |               |             |                 |               |
| <i>Diarrhea</i>              |               |             |                 |               |
| <i>Abdominal pain</i>        |               |             |                 |               |
| <i>Abnormal taste</i>        |               |             |                 |               |
| <i>Flatulence</i>            |               |             |                 |               |
| <i>Headache</i>              |               |             |                 |               |
| <i>Dizziness</i>             |               |             |                 |               |
| <i>Other (discriminate)</i>  |               |             |                 |               |
| Values                       | 0             | 1           | 2               | 3             |
